# Supplementary material for: Meta-Analysis of Genome-Wide Association Studies in Celiac Disease and Rheumatoid Arthritis Identifies Fourteen Non-HLA Shared Loci
Source: PLOS journal article supplement (doi:10.1371/journal.pgen.1002004), 2011-02-24
Supplement: S3 (10.1371/journal.pgen.1002004.s003) [file journal.pgen.1002004.s003]

**Table S1. Established CD SNPs and their association to RA.**

| **genes in the block** | **SNP** | **CHR** | **Top *P*-value CD** | **ref** | **MinAll** | **CD_*P*** | **CD_OR** | **RA_*P*** | **RA_OR** | **comment** |
| --- | --- | --- | --- | --- | --- | --- | --- | --- | --- | --- |
| *OLIG3/TNFAIP3* | rs2327832 | 6 | 4.46E-19 | [2] | G | 2.2E-13 | 1.26 | **5.27E-11** | 1.21 | known RA |
| *TAGAP* | rs1738074 | 6 | 2.94E-15 | [2] | T | 1.3E-07 | 1.15 | **1.95E-05** | 0.90 | known RA |
| *MMEL1/TNFRSF14* | rs3748816 | 1 | 3.28E-09 | [2] | G | 1.6E-06 | 0.87 | **2.41E-05** | 0.90 | known RA |
| *IL2/IL21* | rs13151961 | 4 | 2.18E-27 | [2] | G | 2.2E-16 | 0.72 | **0.001491** | 0.90 | known RA |
| *ICOS/CTLA4* | rs4675374 | 2 | 5.79E-09 | [2] | T | 3.4E-07 | 1.18 | **0.008446** | 1.08 | known RA |
| *REL/PUS10* | rs13003464 | 2 | 3.71E-13 | [2] | G | 2.0E-07 | 1.15 | **0.666077** | 0.99 | known RA |
| *PTPN2* | rs1893217 | 18 | 2.52E-10 | [2] | G | 1.8E-06 | 1.18 | **4.37E-05** | 1.14 |  |
| *ATXN2/SH2B3* | rs653178 | 12 | 7.15E-21 | [2] | C | 8.2E-13 | 1.21 | **0.008776** | 1.07 |  |
| *SOCS1* | rs12928822 | 16 | 3.12E-08 | [2] | T | 2.7E-05 | 0.86 | **0.021861** | 0.93 |  |
| *ICOSLG* | rs4819388 | 21 | 2.46E-09 | [2] | T | 7.8E-05 | 0.89 | **0.024582** | 0.94 |  |
| *ZMIZ1* | rs1250552 | 10 | 9.09E-10 | [2] | G | 2.3E-07 | 0.87 | **0.035941** | 1.05 |  |
| *KIF21B* | rs296547 | 1 | 4.11E-09 | [2] | T | 0.00014 | 0.90 | **0.041076** | 1.05 |  |
| *CCR5/CCR3* | rs13098911 | 3 | 3.26E-17 | [2] | T | 2.0E-10 | 1.32 | 0.085082 | 1.08 |  |
| *LPP* | rs1464510 | 3 | 2.98E-40 | [2] | A | 9.5E-24 | 1.29 | 0.092447 | 0.96 |  |
| *PTPRK* | rs802734 | 6 | 2.62E-14 | [2] | G | 4.1E-06 | 1.14 | 0.101084 | 1.04 |  |
| *RUNX3* | rs10903122 | 1 | 1.73E-10 | [2] | A | 7.4E-05 | 0.90 | 0.167033 | 0.97 |  |
| *GLB1* | rs13314993 | 3 | 3.27E-09 | [2] | G | 1.8E-05 | 1.14 | 0.176583 | 1.04 |  |
| *CD80* | rs11712165 | 3 | 8.03E-09 | [2] | G | 1.4E-05 | 1.13 | 0.210081 | 1.03 |  |
| *RGS1* | rs2816316 | 1 | 2.20E-17 | [2] | C | 1.5E-11 | 0.78 | 0.3704 | 0.97 |  |
| *ETS1* | rs11221332 | 11 | 5.28E-16 | [2] | T | 3.6E-10 | 1.24 | 0.582388 | 1.02 |  |
| *BACH2* | rs10806425 | 6 | 3.89E-10 | [2] | A | 2.4E-05 | 1.12 | 0.60767 | 0.99 |  |
| *PLEK* | rs17035378 | 2 | 7.79E-09 | [2] | C | 7.5E-06 | 0.87 | 0.624455 | 0.99 |  |
| *UBE2E3* | rs13010713 | 2 | 4.74E-11 | [2] | G | 8.9E-08 | 1.16 | 0.667962 | 1.01 |  |
| *IL12A* | rs17810546 | 3 | 3.98E-28 | [2] | G | 1.1E-16 | 1.38 | 0.864962 | 0.99 |  |
| *IL18RAP* | rs917997 | 2 | 1.11E-15 | [2] | T | 1.0E-13 | 1.26 | 0.893909 | 1.00 |  |
| *8q24.2* | rs9792269 | 8 | 3.28E-09 | [2] | G | 2.1E-05 | 0.87 | 0.923524 | 1.00 |  |

Candidate genes in the blocks are mentioned. Top *P*-value in CD is indicated as in the reference paper [2]. CD_*P* column indicates the p-value in CD-GWAS dataset (4,533 cases and 10,750 controls); RA_*P* column indicates the p-value in RA-GWAS dataset (5,539 cases and 17,231 controls). OR is given for the minor allele.
