# Supplementary material for: Meta-Analysis of Genome-Wide Association Studies in Celiac Disease and Rheumatoid Arthritis Identifies Fourteen Non-HLA Shared Loci
Source: PLOS journal article supplement (doi:10.1371/journal.pgen.1002004), 2011-02-24
Supplement: S6 (10.1371/journal.pgen.1002004.s006) [file journal.pgen.1002004.s006]

**Table S4. SNPs associated to CD-RA with *P*<1x10-5 and CD and RA with *P*<0.01; directional analysis.**

| CHR | SNP | POS | ref_allele | CD_OR | CD_*P* | RA_OR | RA_*P* | CD-RA_OR | CD-RA_*P* dir | Locus name |
| --- | --- | --- | --- | --- | --- | --- | --- | --- | --- | --- |
| 1 | rs10752747 | 2557077 | T | 0.88 | 7.82E-06 | 0.90 | 1.72E-05 | 0.89 | 6.31E-10 | *TNFRSF14/MMEL1* |
| 1 | rs3748816 | 2558908 | G | 0.87 | 1.63E-06 | 0.90 | 2.41E-05 | 0.89 | 2.23E-10 | *TNFRSF14/MMEL1* |
| 1 | rs12138909 | 2570900 | T | 0.86 | 0.000347 | 0.87 | 4.33E-05 | 0.87 | 5.61E-08 | *TNFRSF14/MMEL1* |
| 1 | rs3890745 | 2585786 | C | 0.87 | 2.58E-06 | 0.89 | 1.67E-05 | 0.88 | 2.25E-10 | *TNFRSF14/MMEL1* |
| 1 | rs4648356 | 2732322 | A | 0.87 | 3.47E-06 | 0.90 | 2.38E-05 | 0.89 | 4.28E-10 | *TNFRSF14/MMEL1* |
| 1 | rs1917534 | 164128929 | A | 0.91 | 0.000889 | 0.91 | 0.000605 | 0.91 | 1.81E-06 | *CD247* |
| 1 | rs864537 | 164143042 | G | 0.87 | 3.82E-07 | 0.90 | 8.89E-05 | 0.89 | 2.56E-10 | *CD247* |
| 1 | rs2056626 | 164152083 | G | 0.88 | 3.08E-06 | 0.93 | 0.004239 | 0.91 | 1.66E-07 | *CD247* |
| 1 | rs7523907 | 164158905 | C | 0.88 | 1.32E-05 | 0.93 | 0.003795 | 0.91 | 4.06E-07 | *CD247* |
| 2 | rs6726160 | 61076380 | T | 0.89 | 3.16E-05 | 0.92 | 0.000899 | 0.91 | 1.47E-07 | *REL* |
| 2 | rs6706689 | 61082696 | A | 0.88 | 6.91E-06 | 0.92 | 0.001379 | 0.91 | 7.18E-08 | *REL* |
| 2 | rs7574865 | 191790139 | T | 1.09 | 0.007673 | 1.16 | 5.14E-07 | 1.13 | 4.03E-08 | *STAT4* |
| 2 | rs6752770 | 191799069 | G | 1.09 | 0.003435 | 1.12 | 0.000149 | 1.10 | 2.03E-06 | *STAT4* |
| 2 | rs3116496 | 204420018 | C | 1.14 | 0.000104 | 1.09 | 0.004006 | 1.12 | 2.07E-06 | *CTLA4_ICOS* |
| 2 | rs4673260 | 204430993 | C | 1.10 | 0.001082 | 1.10 | 0.000365 | 1.10 | 1.33E-06 | *CTLA4_ICOS* |
| 2 | rs6435203 | 204436701 | G | 1.10 | 0.001015 | 1.10 | 0.000447 | 1.10 | 1.52E-06 | *CTLA4_ICOS* |
| 2 | rs10932019 | 204454316 | G | 1.11 | 0.000535 | 1.10 | 0.000357 | 1.11 | 6.64E-07 | *CTLA4_ICOS* |
| 2 | rs3116507 | 204487030 | G | 1.12 | 0.001317 | 1.11 | 0.000575 | 1.11 | 2.52E-06 | *CTLA4_ICOS* |
| 2 | rs231804 | 204534152 | C | 0.91 | 0.000628 | 0.87 | 3.82E-08 | 0.89 | 1.79E-10 | *CTLA4_ICOS* |
| 2 | rs4675374 | 204628084 | T | 1.18 | 3.38E-07 | 1.08 | 0.008446 | 1.12 | 7.41E-08 | *CTLA4_ICOS* |
| 4 | rs4374642 | 123458716 | C | 1.23 | 9.87E-06 | 1.17 | 0.000418 | 1.20 | 2.18E-08 | *IL2* |
| 4 | rs13151961 | 123473107 | G | 0.72 | 2.22E-16 | 0.90 | 0.001491 | 0.82 | 1.29E-14 | *IL2* |
| 4 | rs4288027 | 123540810 | C | 1.23 | 7.28E-06 | 1.17 | 0.000473 | 1.20 | 1.92E-08 | *IL2* |
| 4 | rs13119723 | 123575918 | G | 0.72 | 6.66E-15 | 0.90 | 0.002542 | 0.82 | 2.18E-13 | *IL2* |
| 4 | rs7678445 | 123640377 | T | 1.25 | 5.71E-06 | 1.18 | 0.000296 | 1.21 | 9.33E-09 | *IL2* |
| 4 | rs6848139 | 123752646 | C | 1.22 | 1.93E-05 | 1.17 | 0.000432 | 1.19 | 4.02E-08 | *IL2* |
| 4 | rs2893008 | 123910419 | G | 1.21 | 7.46E-05 | 1.15 | 0.002025 | 1.18 | 6.91E-07 | *IL2* |
| 4 | rs6840978 | 123912312 | T | 0.77 | 5.65E-13 | 0.90 | 0.000712 | 0.84 | 5.07E-13 | *IL2* |
| 5 | rs159566 | 55545311 | A | 1.12 | 0.000421 | 1.10 | 0.001881 | 1.11 | 2.90E-06 | *ANKRD55* |
| 5 | rs1020388 | 55595784 | G | 0.90 | 0.000154 | 0.90 | 1.26E-05 | 0.90 | 7.67E-09 | *ANKRD55* |
| 6 | rs6933404 | 138000928 | C | 1.27 | 6.81E-12 | 1.22 | 2.28E-11 | 1.24 | 1,78E-20 | *TNFAIP3* |
| 6 | rs13192841 | 138008907 | A | 0.90 | 0.001153 | 0.92 | 0.00217 | 0.91 | 8.54E-06 | *TNFAIP3* |
| 6 | rs12527282 | 138008945 | T | 0.90 | 0.000771 | 0.92 | 0.002099 | 0.91 | 5.81E-06 | *TNFAIP3* |
| 6 | rs2327832 | 138014761 | G | 1.26 | 2.18E-13 | 1.21 | 5.27E-11 | 1.23 | 1,46E-21 | *TNFAIP3* |
| 6 | rs636393 | 138049223 | G | 0.89 | 4.38E-05 | 0.92 | 0.00074 | 0.91 | 1.59E-07 | *TNFAIP3* |
| 6 | rs6917441 | 138060132 | G | 0.91 | 0.003428 | 0.90 | 0.000108 | 0.90 | 1.35E-06 | *TNFAIP3* |
| 7 | rs11984075 | 37210094 | G | 1.15 | 0.001995 | 1.19 | 3.93E-05 | 1.17 | 3.06E-07 | *ELMO1* |
| 8 | rs2142200 | 129382353 | G | 0.90 | 0.000221 | 0.93 | 0.005272 | 0.92 | 5.75E-06 | *8q24.2* |
| 8 | rs975730 | 129385196 | A | 0.90 | 0.000162 | 0.93 | 0.00533 | 0.92 | 4.54E-06 | *8q24.2* |
| 8 | rs975729 | 129385232 | C | 0.90 | 0.000257 | 0.93 | 0.005926 | 0.92 | 7.42E-06 | *8q24.2* |
| 8 | rs4265149 | 129420667 | T | 0.90 | 0.000212 | 0.93 | 0.00486 | 0.92 | 5.03E-06 | *8q24.2* |
| 9 | rs1953126 | 120720054 | T | 1.08 | 0.009476 | 1.10 | 7.22E-05 | 1.09 | 2.80E-06 | *TRAF1* |
| 10 | rs2181622 | 6431067 | G | 0.93 | 0.009646 | 0.90 | 0.000159 | 0.91 | 5.68E-06 | *PRKCQ* |
| 10 | rs6585827 | 124155605 | A | 1.09 | 0.000986 | 1.09 | 0.00019 | 1.09 | 6.41E-07 | *HTRA1* |
| 10 | rs2280141 | 124183171 | G | 1.09 | 0.001077 | 1.09 | 0.000226 | 1.09 | 8.26E-07 | *HTRA1* |
| 11 | rs10892258 | 118085075 | A | 0.91 | 0.002734 | 0.89 | 3.83E-05 | 0.90 | 4.06E-07 | *DDX6* |
| 11 | rs10892279 | 118116991 | A | 0.91 | 0.005309 | 0.87 | 7.42E-06 | 0.89 | 2.03E-07 | *DDX6* |
| 11 | rs2155433 | 118118131 | A | 0.91 | 0.006747 | 0.87 | 8.81E-06 | 0.89 | 3.11E-07 | *DDX6* |
| 11 | rs10892286 | 118147295 | C | 0.91 | 0.004133 | 0.88 | 1.53E-05 | 0.89 | 2.82E-07 | *DDX6* |
| 11 | rs715412 | 118189820 | A | 0.91 | 0.003426 | 0.88 | 3.74E-05 | 0.89 | 5.09E-07 | *DDX6* |
| 11 | rs4938573 | 118247052 | C | 0.90 | 0.009509 | 0.89 | 0.000217 | 0.90 | 6.59E-06 | *DDX6* |
| 11 | rs6421571 | 118248982 | T | 0.89 | 0.001211 | 0.89 | 0.000116 | 0.89 | 4.88E-07 | *DDX6* |
| 12 | rs10876993 | 56348934 | C | 0.91 | 0.001285 | 0.92 | 0.002328 | 0.92 | 9.96E-06 | *CDK4* |
| 12 | rs3184504 | 110347328 | T | 1.21 | 1.23E-12 | 1.07 | 0.00804 | 1.13 | 1.40E-11 | *SH2B3* |
| 12 | rs653178 | 110470476 | C | 1.21 | 8.19E-13 | 1.07 | 0.008776 | 1.13 | 1.34E-11 | *SH2B3* |
| 16 | rs243323 | 11268703 | G | 0.90 | 0.000411 | 0.93 | 0.003882 | 0.91 | 6.60E-06 | *SOCS1* |
| 18 | rs10460003 | 12737012 | T | 1.19 | 0.000324 | 1.16 | 0.000595 | 1.17 | 6.97E-07 | *PTPN2* |
| 18 | rs1893217 | 12799340 | G | 1.18 | 1.81E-06 | 1.14 | 4.37E-05 | 1.16 | 4.31E-10 | *PTPN2* |
| 18 | rs478582 | 12825976 | C | 0.93 | 0.006823 | 0.92 | 0.000327 | 0.92 | 7.46E-06 | *PTPN2* |
| 18 | rs657555 | 12837136 | C | 1.13 | 0.000388 | 1.13 | 0.00016 | 1.13 | 2.20E-07 | *PTPN2* |
| 21 | rs11203203 | 42709255 | A | 1.10 | 0.002014 | 1.11 | 4.23E-05 | 1.10 | 3.05E-07 | *UBASH3A* |
| 21 | rs7283760 | 44465057 | A | 0.90 | 0.000273 | 0.93 | 0.007237 | 0.92 | 9.63E-06 | *ICOSLG* |
| 22 | rs5754217 | 20264229 | T | 1.16 | 2.21E-06 | 1.10 | 0.001057 | 1.13 | 1.88E-08 | *UBE2L3* |
| 22 | rs4821112 | 20289315 | A | 1.16 | 2.85E-06 | 1.10 | 0.00104 | 1.13 | 2.23E-08 | *UBE2L3* |
| 22 | rs2298428 | 20307446 | T | 1.18 | 8.72E-07 | 1.11 | 0.000816 | 1.14 | 6.80E-09 | *UBE2L3* |

The table includes all SNPs associated to CD-RA in directional GWAS meta-analysis with *P*(combined)<1x10-5 (column ‘CD-RA_*P* dir’) and *P*-value per diseases  *P*<0.01 (columns ‘CD_*P*’ and ‘RA_*P*’). OR is given for the reference (minor) allele.
