# Supplementary material for: Meta-Analysis of Genome-Wide Association Studies in Celiac Disease and Rheumatoid Arthritis Identifies Fourteen Non-HLA Shared Loci
Source: PLOS journal article supplement (doi:10.1371/journal.pgen.1002004), 2011-02-24
Supplement: S8 (10.1371/journal.pgen.1002004.s008) [file journal.pgen.1002004.s008]

**Table S6. SNPs associated to CD-RA with *P*<1x10-5 and CD and RA with *P*<0.01; analysis of opposite allelic effect.**

| CHR | SNP | POS | ref allele | CD_OR | CD_*P* | RA_OR | RA_*P* | CD-RA_*P*_opp | gene |
| --- | --- | --- | --- | --- | --- | --- | --- | --- | --- |
| 1 | rs1926261 | 91874941 | C | 1.12 | 0.000407 | 0.92 | 0.004857 | 8.25E-06 | *TGFBR3* |
| 1 | rs1772408 | 155818722 | A | 1.15 | 0.000201 | 0.91 | 0.004485 | 4.96E-06 | *IFI16* |
| 2 | rs7579944 | 30356677 | T | 1.12 | 6.46E-05 | 0.90 | 0.000132 | 3.24E-08 | *LBH* |
| 2 | rs1355208 | 30356973 | A | 1.12 | 6.74E-05 | 0.90 | 0.000137 | 3.48E-08 | *LBH* |
| 2 | rs1396836 | 30357734 | T | 1.11 | 0.000357 | 0.92 | 0.003271 | 4.54E-06 | *LBH* |
| 2 | rs906868 | 30359995 | G | 1.11 | 9.35E-05 | 0.90 | 0.000207 | 7.19E-08 | *LBH* |
| 2 | rs778757 | 61693698 | T | 1.11 | 0.000219 | 0.93 | 0.004144 | 4.05E-06 | *REL/PUS10* |
| 2 | rs1194849 | 65518304 | C | 0.93 | 0.004431 | 1.13 | 8.99E-07 | 2.75E-08 | *SPRED2* |
| 2 | rs1876518 | 65520560 | T | 0.93 | 0.004187 | 1.13 | 7.65E-07 | 2.24E-08 | *SPRED2* |
| 6 | rs1033522 | 159406178 | G | 1.08 | 0.005911 | 0.91 | 0.000301 | 5.96E-06 | *TAGAP* |
| 6 | rs926657 | 159433861 | T | 1.25 | 8.24E-06 | 0.87 | 0.007235 | 3.98E-07 | *TAGAP* |
| 6 | rs9295089 | 159434373 | C | 1.21 | 4.93E-06 | 0.89 | 0.005033 | 1.71E-07 | *TAGAP* |
| 6 | rs1738074 | 159436386 | T | 1.15 | 1.32E-07 | 0.90 | 1.95E-05 | 1.76E-11 | *TAGAP* |
| 6 | rs212402 | 159442704 | G | 1.15 | 5.81E-07 | 0.88 | 3.22E-06 | 9.32E-12 | *TAGAP* |
| 6 | rs169858 | 159455185 | T | 1.08 | 0.008668 | 0.91 | 0.000217 | 6.89E-06 | *TAGAP* |
| 6 | rs212388 | 159460845 | C | 1.14 | 3.25E-06 | 0.88 | 3.64E-07 | 5.43E-12 | *TAGAP* |
| 6 | rs654690 | 159485187 | T | 1.14 | 4.70E-05 | 0.88 | 1.92E-06 | 3.76E-10 | *TAGAP* |
| 6 | rs2249937 | 159485718 | T | 1.12 | 0.000148 | 0.88 | 3.02E-06 | 1.87E-09 | *TAGAP* |
| 7 | rs4626515 | 139357314 | C | 0.88 | 0.003138 | 1.17 | 4.09E-05 | 4.62E-07 | *JHDM1D* |
| 11 | rs11043097 | 11092371 | C | 1.15 | 6.07E-05 | 0.90 | 0.000755 | 2.04E-07 | *GALNTL4* |
| 14 | rs17103033 | 34626231 | C | 1.12 | 0.002804 | 0.89 | 0.00076 | 6.75E-06 | *PPP2R3C* |

The table includes all SNPs associated to CD-RA in GWAS meta-analysis of opposite alleleic effect with *P*(combined) *P*<1x10-5 (column ‘CD-RA_*P*_opp’) and *P*-value per diseases *P*<0.01 (columns CD_*P* and RA_*P*).
